# Supplementary material
Source: PubMed Central journal article supplement (PMC4413333)
Supplement: pnas.201423817SI.pdf [file pnas.201423817SI.pdf]

# Supporting Information

Shimokawa-Chiba et al. 10.1073/pnas.1423817112

## SI Experimental Procedures

**Bacterial Strains and Plasmids.** All *B. subtilis* strains used in this study were derivatives of the WT strain PY79 (1) and were constructed by transformation with either plasmid, purified *B. subtilis* chromosomal DNA or a linear DNA fragment. Plasmids and linear DNA fragments used for transformation of *B. subtilis* were constructed by standard cloning methods, PCR, site-directed mutagenesis (2), PrimeSTAR mutagenesis (Takara), Gibson assembly (3), or combinations of these methods. We used the sets of oligo DNA primers in combination with template plasmid or *B. subtilis* chromosomal DNA as indicated in Tables S2, S3, and S4. PrimeSTAR mutagenesis was carried out according to the manufacturer's instructions with the following minor modifications: (i) PrimeSTAR GXL DNA Polymerase instead of PrimeSTAR Max DNA Polymerase was used for PCR, (ii) PCR products were treated with DpnI (New England Biolab) for 1 h at 37 °C to remove template DNA enzymatically, and (iii) a fraction of the PCR products were circularized by recombining their ends intramolecularly by Gibson assembly.

When an engineered gene was introduced into the *B. subtilis* chromosome by recombination, the recombinants were checked for their antibiotic resistance, inactivation of *amyE*, and the absence of any drug resistance markers originally present on the plasmid backbone. The nucleotide sequence of the chromosomal DNA was also analyzed if necessary. As the reporter to measure the levels of *yidC2* induction, we used the *lacZ* translational fusion gene *mifM-yidC2'-lacZ*, in which *lacZ* was fused in-frame after the sixth codon of *yidC2* (4).

**NEM Reactivity Assay.** For NEM reactivity assay, *B. subtilis* cells from 2-mL portions of cultures were collected by centrifugation (20,400 × g for 3 min at 4 °C), washed with 1 mL of 50 mM Tris-HCl (pH 6.8), and then resuspended in 50 µL of TSM buffer

[20 mM Tris-HCl (pH 6.8), 0.5 M sucrose, 20 mM MgCl<sub>2</sub>]. Cells were then treated with 20 mM NEM (Sigma) on ice for 90 min in TSM buffer to alkylate the engineered Cys residue of SpoIIIJ if water was available around it. The NEM modification was stopped by adding DTT (final 100 mM), followed by washing the cells twice with 1 mL of TSM to remove excess DTT. Cells were then mixed with 400 µL of 5% (wt/vol) TCA, left on ice for 20 min, and centrifuged. Pelleted cells were washed with 800 µL of 1 M Tris-HCl (pH 8.0), resuspended in 20 µL of TSE buffer [33 mM Tris-HCl (pH 8.0), 40% (wt/vol) sucrose, 1 mM EDTA] containing 1 mg/mL lysozyme and incubated at 37 °C for 10 min. Samples were solubilized by adding 20 µL of 2× SDS loading buffer [250 mM Tris-HCl (pH 6.8), 4% (wt/vol) SDS, 30% (vol/vol) glycerol, 0.2% bromophenol blue] without added DTT. They were divided into two portions, a control portion that received 64 mM DTT and an experimental portion that did not, and subjected to countermodification with 3.5 mg/mL Mal-PEG (5000; Fluka) at 37 °C for 90 min with vigorous mixing. The Mal-PEG modification reaction was then stopped by adding DTT (final concentration of 60 mM) to the experimental samples. Modified and unmodified SpoIIIJ species were separated by SDS/PAGE and detected by anti-SpoIIIJ immunoblotting to assess the NEM reactivity of a target Cys.

**Growth Complementation Assay.** For the growth complementation assay, *B. subtilis* cells harboring pCH1805, a rescue plasmid encoding IPTG-inducible *spoIIIJ-FLAG*, along with a spectinomycin resistance gene, were cultured at 37 °C in LB supplemented with 100 µg/mL spectinomycin and 1 mM IPTG. Four-microliter portions of serially diluted full-growth cultures were then spotted onto LB-spectinomycin agar plates with and without 1 mM IPTG and incubated at 37 °C for 17.5 h.

- Youngman P, Perkins JB, Losick R (1984) A novel method for the rapid cloning in *Escherichia coli* of *Bacillus subtilis* chromosomal DNA adjacent to Tn917 insertions. *Mol Gen Genet* 195(3):424–433.
- Sawano A, Miyawaki A (2000) Directed evolution of green fluorescent protein by a new versatile PCR strategy for site-directed and semi-random mutagenesis. *Nucleic Acids Res* 28(16):E78.
- Gibson DG, et al. (2009) Enzymatic assembly of DNA molecules up to several hundred kilobases. *Nat Methods* 6(5):343–345.
- Chiba S, Lamsa A, Pogliano K (2009) A ribosome-nascent chain sensor of membrane protein biogenesis in *Bacillus subtilis*. *EMBO J* 28(22):3461–3475.

```

Bs_SpoIIIJ 1 -MLLKRRIGLLLSMVGVFMLLAGCSSLVKEPITADSPHFWDKYVVYPLSEL 49
          ..:|:|: | |:|.:.:.:.:| |:|.:.: | |:|:|.:.:.:| |:|.:.: | |:|:|.:.:| |:|.:.:
Bh_YidC2 1 MNYMKRRL-LLLAGILLVVALAGCSTT-DPITSESEGIWNHFFVYPMSSL 48

Bs_SpoIIIJ 50 ITYVAKLTGDNVGLSIIIVTILIRLLILPLMIKQLRSSKAMQALQPEMQK 99
          | | . | . | . . . : | | | | | : | | | | | : | | . | . : | | . : | | . : | | . :
Bh_YidC2 49 ITTVANLLNGSYGLSIIIVTILIRLALLPLTLKQKSMRAMQVIRPEMEA 98

Bs_SpoIIIJ 100 LKEKY---SSKDQKTQKQLQOETMALFQKHGWNPLAGCFPILIQMPILIG 146
          : : : | | : | | | . | | : | | . : | | | | | : | | | . | | . : | | | :
Bh_YidC2 99 IQKYYKEKASKDKPRVQQEMQKELGLYQKHGWNPMAGCLPLFIQLPILMA 148

Bs_SpoIIIJ 147 FYHAIMRTQAISEHSLWFLDGEKDPYIILPIVAGVATFVQKQLMMAGNA 196
          | | . | | | | | . : | | . : | | | | | : | | | | | : | | . | . : | | . : | | . :
Bh_YidC2 149 FYFAIMRTEEIRYHTFLWFDLQGPD--YILPFVAGITTYFQKMTMSHQQ 196

Bs_SpoIIIJ 197 QQ---NP-----QMAMMLWIMPIMIIVFAINFPAALSPLYVVV 230
          | . | | | | | | | | | | | | | | | | | | | | | | | | | | | | | | | | | | |
Bh_YidC2 197 QMQKTNPSSDSDNPMANMQMVKVLYVMPVMI IAGLSLPSALSPLYVVI 246

Bs_SpoIIIJ 231 GNLFMIAQTF--LIKGPDI-----KKNPEPQAGKGGK 261
          | | : | | | . | | : : | | . : : | | . : : | | . : | |
Bh_YidC2 247 GNIFMIIQTYFIVVKAPPLEVEQTKQKSSKPNK----- 280
  
```

**Fig. S1.** Pairwise protein sequence alignment between *B. subtilis* SpoIIIJ and *B. halodurans* YidC2. The amino acid sequence alignment was generated by EMBOSS Needle. The crucial Arg73 of *B. subtilis* SpoIIIJ and its homologous Arg72 of *B. halodurans* YidC2 are shown in red.

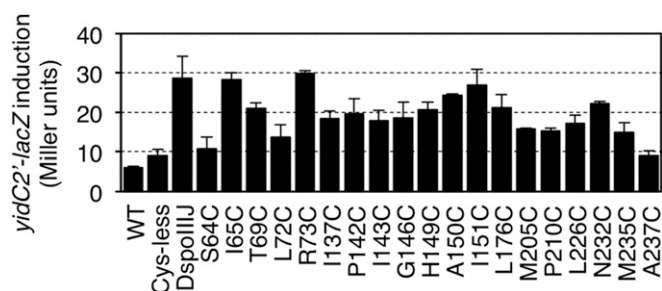

**Fig. S2.** Activities of the monocysteine variants of SpoIIIJ to insert MifM into the membrane. The efficiency of MifM insertion was determined by  $\beta$ -gal activity (mean  $\pm$  SD,  $n = 3$ ) from the *yidC2'-lacZ* reporter gene expressed in each *spoIIIJ* mutant strain. After preliminary blue-white assessment of  $\beta$ -gal activities of all the monocysteine derivatives of *spoIIIJ* in colonies on an LB agar plate supplemented with 60  $\mu$ g/mL X-Gal (5-bromo-4-chloro-3-indolyl- $\beta$ -D-galactopyranoside), mutant strains giving blue colonies were subjected to the quantitative  $\beta$ -gal activity assays. All strains except WT and  $\Delta$ *spoIIIJ* ( $\Delta$ spoIIIJ) had the C134A mutation in addition to the second site mutation indicated at the bottom of each bar graph. MifM insertion efficiency is inversely correlated with the level of the *yidC2'-lacZ* induction. Eight mutants (I65C, T69C, R73C, H149C, A150C, I151C, L176C, and N232C) exhibiting  $\beta$ -gal activities of 20 units or higher are regarded as nonfunctional spoIIIJ mutants and are shown in striped colors in Fig. 2 A and B).

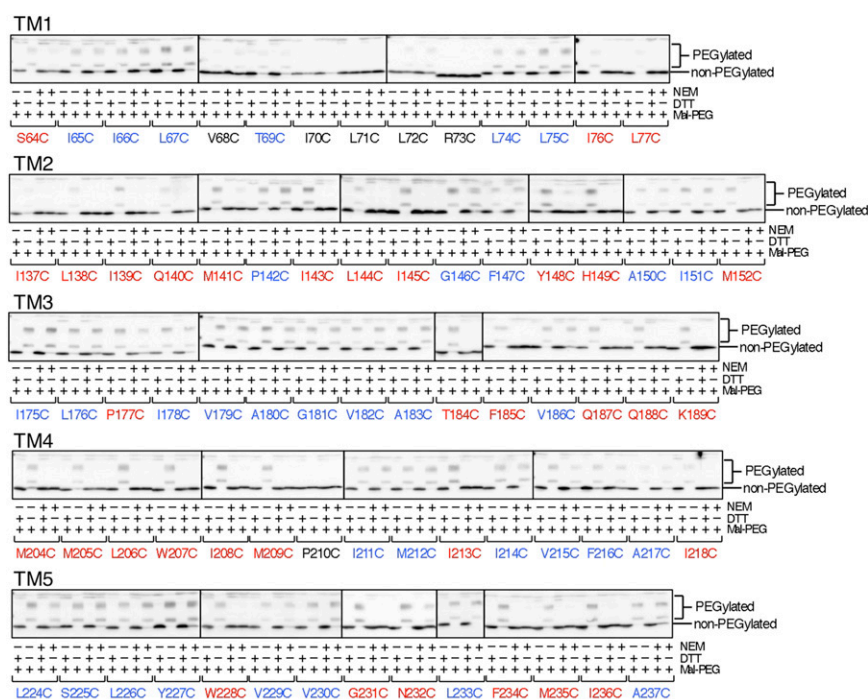

**Fig. S3.** NEM reactivity assay to assess water accessibility of Cys introduced into the SpoIIIJ TM regions. *B. subtilis* strains expressing a monocysteine derivative of SpoIIIJ were subjected to the NEM and Mal-PEG modification experiments as described in Fig. 2. The NEM-unmodified but PEG-modified and NEM-unmodified but PEG-modified SpoIIIJ species were separated by electrophoresis and detected by anti-SpoIIIJ immunoblotting. Positions of Cys introduced into SpoIIIJ are indicated at the bottom. Each sample received the different treatments as indicated by +. DTT in excess was included in alternate samples at the PEGylation step to give unmodified controls. PEGylated SpoIIIJ forms multiple slow-migrating bands due to heterogeneity of the Mal-PEG preparation. Mutant proteins that received high-efficiency (>50%) NEM modification are shown in red, and those mutant proteins that received lower (<50%) NEM modification are shown in blue. SpoIIIJ derivatives that could not be assessed because of the lack of PEGylation, even without NEM treatment, are shown in black.

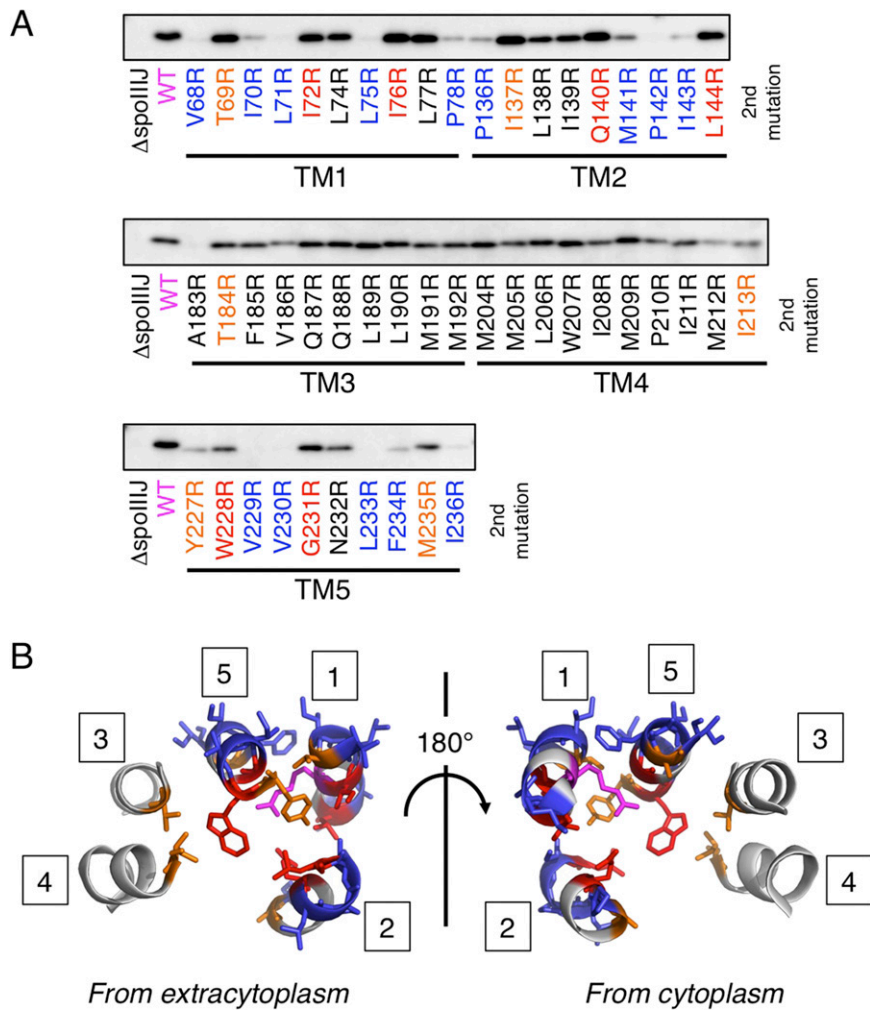

**Fig. 54.** Cellular accumulation of the Arg-relocated mutants of SpoIIIJ. (A) Cellular accumulation of SpoIIIJ was determined by anti-SpoIIIJ immunoblotting. Red and orange labels represent mutant *spoIIIJ* derivatives that exhibited low (<15 units) and intermediate (15–25 units) levels of  $\beta$ -gal activities expressed from the *yidC2-lacZ* reporter gene (Fig. 4), indicating high (red) and intermediate (orange) efficiencies of MifM insertion, respectively. Blue labels represent the mutant SpoIIIJ proteins that accumulated at a very low level, whereas black labels represent the mutant SpoIIIJ proteins with a normal cellular accumulation level but a defective activity to insert MifM. (B) Schematic representation of the TM regions of *B. halodurans* YidC2, with the sites (in *B. subtilis* SpoIIIJ numbering) of Arg relocation highlighted. The Arg introduction into the equivalent residues in the *B. subtilis* SpoIIIJ-R73A destabilized the SpoIIIJ protein itself (blue) or restored the MifM insertion activity to a high (red) or an intermediate (orange) level as shown in Fig. 4. The original position of the crucial Arg (Arg73 in *B. subtilis* numbering) is shown in magenta. The black numbers in squares represent numbers of TM segments.

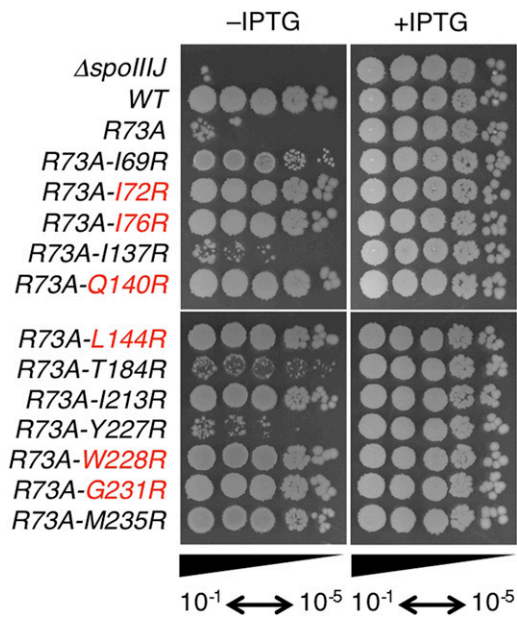

**Fig. S5.** Growth-supporting function of the Arg-relocated SpoIIIJ mutants. Growth complementation tests were carried out as described in the legend for Fig. 3C, using the indicated *spoIIIJ* alleles on the chromosome. The *spoIIIJ* mutations that efficiently supported the MifM insertion (Fig. 4) are shown in red.



**Table S1. Strain list**

| Strains | Genotype                                                    | Source              |
|---------|-------------------------------------------------------------|---------------------|
| SCB2972 | <i>ΔspolI::tet, amyE::mifM-yidC2'-lacZΩcat</i>              | Kumazaki et al. (1) |
| SCB2974 | <i>spolIΩkan, amyE::mifM-yidC2'-lacZΩcat</i>                | Kumazaki et al. (1) |
| SCB3045 | <i>ΔspolI::tet, ΔyidC2::ermI/pCH1805 (Pspac spolI-FLAG)</i> | Kumazaki et al. (1) |
| SCB3055 | <i>spolIΩkan, ΔyidC2::ermI/pCH1805 (Pspac spolI-FLAG)</i>   | Kumazaki et al. (1) |
| SCB3142 | <i>spolI-C134AΩkan, amyE::mifM-yidC2'-lacZΩcat</i>          | This study          |
| SCB3210 | <i>spolI-L71C-C134AΩkan, amyE::mifM-yidC2'-lacZΩcat</i>     | This study          |
| SCB3211 | <i>spolI-R73C-C134AΩkan, amyE::mifM-yidC2'-lacZΩcat</i>     | This study          |
| SCB3212 | <i>spolI-C134A-V186CΩkan, amyE::mifM-yidC2'-lacZΩcat</i>    | This study          |
| SCB3213 | <i>spolI-C134A-Q187CΩkan, amyE::mifM-yidC2'-lacZΩcat</i>    | This study          |
| SCB3214 | <i>spolI-C134A-W228CΩkan, amyE::mifM-yidC2'-lacZΩcat</i>    | This study          |
| SCB3303 | <i>spolI-C134A-E169CΩkan, amyE::mifM-yidC2'-lacZΩcat</i>    | This study          |
| SCB3304 | <i>spolI-C134A-V179CΩkan, amyE::mifM-yidC2'-lacZΩcat</i>    | This study          |
| SCB3305 | <i>spolI-C134A-A180CΩkan, amyE::mifM-yidC2'-lacZΩcat</i>    | This study          |
| SCB3306 | <i>spolI-C134A-G181CΩkan, amyE::mifM-yidC2'-lacZΩcat</i>    | This study          |
| SCB3307 | <i>spolI-C134A-V182CΩkan, amyE::mifM-yidC2'-lacZΩcat</i>    | This study          |
| SCB3308 | <i>spolI-C134A-A183CΩkan, amyE::mifM-yidC2'-lacZΩcat</i>    | This study          |
| SCB3309 | <i>spolI-C134A-F185CΩkan, amyE::mifM-yidC2'-lacZΩcat</i>    | This study          |
| SCB3310 | <i>spolI-C134A-Q188CΩkan, amyE::mifM-yidC2'-lacZΩcat</i>    | This study          |
| SCB3311 | <i>spolI-C134A-K189CΩkan, amyE::mifM-yidC2'-lacZΩcat</i>    | This study          |
| SCB3425 | <i>spolI-C134A-I137CΩkan, amyE::mifM-yidC2'-lacZΩcat</i>    | This study          |
| SCB3426 | <i>spolI-C134A-L138CΩkan, amyE::mifM-yidC2'-lacZΩcat</i>    | This study          |
| SCB3427 | <i>spolI-C134A-I139CΩkan, amyE::mifM-yidC2'-lacZΩcat</i>    | This study          |
| SCB3428 | <i>spolI-C134A-M141CΩkan, amyE::mifM-yidC2'-lacZΩcat</i>    | This study          |
| SCB3429 | <i>spolI-C134A-I143CΩkan, amyE::mifM-yidC2'-lacZΩcat</i>    | This study          |
| SCB3430 | <i>spolI-C134A-L145CΩkan, amyE::mifM-yidC2'-lacZΩcat</i>    | This study          |
| SCB3431 | <i>spolI-C134A-G146CΩkan, amyE::mifM-yidC2'-lacZΩcat</i>    | This study          |
| SCB3432 | <i>spolI-C134A-L224CΩkan, amyE::mifM-yidC2'-lacZΩcat</i>    | This study          |
| SCB3433 | <i>spolI-C134A-S225CΩkan, amyE::mifM-yidC2'-lacZΩcat</i>    | This study          |
| SCB3434 | <i>spolI-C134A-L226CΩkan, amyE::mifM-yidC2'-lacZΩcat</i>    | This study          |
| SCB3435 | <i>spolI-C134A-L233CΩkan, amyE::mifM-yidC2'-lacZΩcat</i>    | This study          |
| SCB3439 | <i>spolI-C134A-Y227CΩkan, amyE::mifM-yidC2'-lacZΩcat</i>    | This study          |
| SCB3440 | <i>spolI-C134A-V229CΩkan, amyE::mifM-yidC2'-lacZΩcat</i>    | This study          |
| SCB3441 | <i>spolI-C134A-Q140CΩkan, amyE::mifM-yidC2'-lacZΩcat</i>    | This study          |
| SCB3442 | <i>spolI-C134A-P142CΩkan, amyE::mifM-yidC2'-lacZΩcat</i>    | This study          |
| SCB3443 | <i>spolI-C134A-F147CΩkan, amyE::mifM-yidC2'-lacZΩcat</i>    | This study          |
| SCB3444 | <i>spolI-C134A-V230CΩkan, amyE::mifM-yidC2'-lacZΩcat</i>    | This study          |
| SCB3445 | <i>spolI-C134A-L144CΩkan, amyE::mifM-yidC2'-lacZΩcat</i>    | This study          |
| SCB3516 | <i>spolI-C134A-T184CΩkan, amyE::mifM-yidC2'-lacZΩcat</i>    | This study          |
| SCB3517 | <i>spolI-C134A-G231CΩkan, amyE::mifM-yidC2'-lacZΩcat</i>    | This study          |
| SCB3518 | <i>spolI-C134A-I175CΩkan, amyE::mifM-yidC2'-lacZΩcat</i>    | This study          |
| SCB3519 | <i>spolI-C134A-L176CΩkan, amyE::mifM-yidC2'-lacZΩcat</i>    | This study          |
| SCB3520 | <i>spolI-C134A-P177CΩkan, amyE::mifM-yidC2'-lacZΩcat</i>    | This study          |
| SCB3521 | <i>spolI-C134A-I178CΩkan, amyE::mifM-yidC2'-lacZΩcat</i>    | This study          |
| SCB3535 | <i>spolI-C134A-N232CΩkan, amyE::mifM-yidC2'-lacZΩcat</i>    | This study          |
| SCB3536 | <i>spolI-C134A-I65CΩkan, amyE::mifM-yidC2'-lacZΩcat</i>     | This study          |
| SCB3537 | <i>spolI-C134A-I66CΩkan, amyE::mifM-yidC2'-lacZΩcat</i>     | This study          |
| SCB3538 | <i>spolI-C134A-L67CΩkan, amyE::mifM-yidC2'-lacZΩcat</i>     | This study          |
| SCB3539 | <i>spolI-C134A-V68CΩkan, amyE::mifM-yidC2'-lacZΩcat</i>     | This study          |
| SCB3540 | <i>spolI-C134A-I70CΩkan, amyE::mifM-yidC2'-lacZΩcat</i>     | This study          |
| SCB3541 | <i>spolI-C134A-L74CΩkan, amyE::mifM-yidC2'-lacZΩcat</i>     | This study          |
| SCB3542 | <i>spolI-C134A-I76CΩkan, amyE::mifM-yidC2'-lacZΩcat</i>     | This study          |
| SCB3543 | <i>spolI-C134A-L77CΩkan, amyE::mifM-yidC2'-lacZΩcat</i>     | This study          |
| SCB3544 | <i>spolI-C134A-Y148CΩkan, amyE::mifM-yidC2'-lacZΩcat</i>    | This study          |
| SCB3545 | <i>spolI-C134A-A150CΩkan, amyE::mifM-yidC2'-lacZΩcat</i>    | This study          |
| SCB3546 | <i>spolI-C134A-I151CΩkan, amyE::mifM-yidC2'-lacZΩcat</i>    | This study          |
| SCB3547 | <i>spolI-C134A-M152CΩkan, amyE::mifM-yidC2'-lacZΩcat</i>    | This study          |
| SCB3548 | <i>spolI-C134A-W207CΩkan, amyE::mifM-yidC2'-lacZΩcat</i>    | This study          |
| SCB3549 | <i>spolI-C134A-M209CΩkan, amyE::mifM-yidC2'-lacZΩcat</i>    | This study          |
| SCB3550 | <i>spolI-C134A-P210CΩkan, amyE::mifM-yidC2'-lacZΩcat</i>    | This study          |
| SCB3551 | <i>spolI-C134A-I211CΩkan, amyE::mifM-yidC2'-lacZΩcat</i>    | This study          |
| SCB3552 | <i>spolI-C134A-M212CΩkan, amyE::mifM-yidC2'-lacZΩcat</i>    | This study          |
| SCB3553 | <i>spolI-C134A-I213CΩkan, amyE::mifM-yidC2'-lacZΩcat</i>    | This study          |
| SCB3554 | <i>spolI-C134A-V215CΩkan, amyE::mifM-yidC2'-lacZΩcat</i>    | This study          |

Table S1. Cont.

| Strains | Genotype                                                                  | Source     |
|---------|---------------------------------------------------------------------------|------------|
| SCB3555 | <i>spolIIIJ-C134A-F216CΩkan, amyE::mifM-yidC2'-lacZΩcat</i>               | This study |
| SCB3556 | <i>spolIIIJ-C134A-A217CΩkan, amyE::mifM-yidC2'-lacZΩcat</i>               | This study |
| SCB3557 | <i>spolIIIJ-C134A-I218CΩkan, amyE::mifM-yidC2'-lacZΩcat</i>               | This study |
| SCB3558 | <i>spolIIIJ-C134A-M235CΩkan, amyE::mifM-yidC2'-lacZΩcat</i>               | This study |
| SCB3559 | <i>spolIIIJ-C134A-I236CΩkan, amyE::mifM-yidC2'-lacZΩcat</i>               | This study |
| SCB3560 | <i>spolIIIJ-C134A-A237CΩkan, amyE::mifM-yidC2'-lacZΩcat</i>               | This study |
| SCB3562 | <i>spolIIIJ-C134A-L75CΩkan, amyE::mifM-yidC2'-lacZΩcat</i>                | This study |
| SCB3564 | <i>spolIIIJ-C134A-M204CΩkan, amyE::mifM-yidC2'-lacZΩcat</i>               | This study |
| SCB3565 | <i>spolIIIJ-C134A-M205CΩkan, amyE::mifM-yidC2'-lacZΩcat</i>               | This study |
| SCB3566 | <i>spolIIIJ-C134A-I214CΩkan, amyE::mifM-yidC2'-lacZΩcat</i>               | This study |
| SCB3567 | <i>spolIIIJ-C134A-T69CΩkan, amyE::mifM-yidC2'-lacZΩcat</i>                | This study |
| SCB3568 | <i>spolIIIJ-C134A-I72CΩkan, amyE::mifM-yidC2'-lacZΩcat</i>                | This study |
| SCB3570 | <i>spolIIIJ-C134A-H149CΩkan, amyE::mifM-yidC2'-lacZΩcat</i>               | This study |
| SCB3571 | <i>spolIIIJ-C134A-S64CΩkan, amyE::mifM-yidC2'-lacZΩcat</i>                | This study |
| SCB3587 | <i>spolIIIJ-C134A-F234CΩkan, amyE::mifM-yidC2'-lacZΩcat</i>               | This study |
| SCB3588 | <i>spolIIIJ-C134A-L206CΩkan, amyE::mifM-yidC2'-lacZΩcat</i>               | This study |
| SCB3589 | <i>spolIIIJ-C134A-I208CΩkan, amyE::mifM-yidC2'-lacZΩcat</i>               | This study |
| SCB2989 | <i>spolIIIJ-R73AΩkan, amyE::mifM-yidC2'-lacZΩcat</i>                      | This study |
| SCB3056 | <i>spolIIIJ-R73AΩkan, ΔyidC2::ermIpCH1805 (Pspac spolIIIJ-FLAG)</i>       | This study |
| SCB3141 | <i>spolIIIJ-R73A-Q140RΩkan, amyE::mifM-yidC2'-lacZΩcat</i>                | This study |
| SCB3177 | <i>spolIIIJ-R73A-G231RΩkan, ΔyidC2::ermIpCH1805 (Pspac spolIIIJ-FLAG)</i> | This study |
| SCB3178 | <i>spolIIIJ-R73A-Q140RΩkan, ΔyidC2::ermIpCH1805 (Pspac spolIIIJ-FLAG)</i> | This study |
| SCB3412 | <i>spolIIIJ-R73A-W228RΩkan, amyE::mifM-yidC2'-lacZΩcat</i>                | This study |
| SCB3413 | <i>spolIIIJ-R73A-L233RΩkan, amyE::mifM-yidC2'-lacZΩcat</i>                | This study |
| SCB3414 | <i>spolIIIJ-R73A-N232RΩkan, amyE::mifM-yidC2'-lacZΩcat</i>                | This study |
| SCB3415 | <i>spolIIIJ-R73A-M235RΩkan, amyE::mifM-yidC2'-lacZΩcat</i>                | This study |
| SCB3416 | <i>spolIIIJ-R73A-I236RΩkan, amyE::mifM-yidC2'-lacZΩcat</i>                | This study |
| SCB3417 | <i>spolIIIJ-R73A-V229RΩkan, amyE::mifM-yidC2'-lacZΩcat</i>                | This study |
| SCB3418 | <i>spolIIIJ-R73A-V230RΩkan, amyE::mifM-yidC2'-lacZΩcat</i>                | This study |
| SCB3419 | <i>spolIIIJ-R73A-F234RΩkan, amyE::mifM-yidC2'-lacZΩcat</i>                | This study |
| SCB3612 | <i>spolIIIJ-V68R/R73AΩkan, amyE::mifM-yidC2'-lacZΩcat</i>                 | This study |
| SCB3614 | <i>spolIIIJ-T69R/R73AΩkan, amyE::mifM-yidC2'-lacZΩcat</i>                 | This study |
| SCB3616 | <i>spolIIIJ-I70R/R73AΩkan, amyE::mifM-yidC2'-lacZΩcat</i>                 | This study |
| SCB3619 | <i>spolIIIJ-I72R/R73AΩkan, amyE::mifM-yidC2'-lacZΩcat</i>                 | This study |
| SCB3620 | <i>spolIIIJ-R73A/L74RΩkan, amyE::mifM-yidC2'-lacZΩcat</i>                 | This study |
| SCB3622 | <i>spolIIIJ-R73A/L75RΩkan, amyE::mifM-yidC2'-lacZΩcat</i>                 | This study |
| SCB3624 | <i>spolIIIJ-R73A/I76RΩkan, amyE::mifM-yidC2'-lacZΩcat</i>                 | This study |
| SCB3626 | <i>spolIIIJ-R73A/L77RΩkan, amyE::mifM-yidC2'-lacZΩcat</i>                 | This study |
| SCB3628 | <i>spolIIIJ-R73A/P78RΩkan, amyE::mifM-yidC2'-lacZΩcat</i>                 | This study |
| SCB3630 | <i>spolIIIJ-R73A/P136RΩkan, amyE::mifM-yidC2'-lacZΩcat</i>                | This study |
| SCB3632 | <i>spolIIIJ-R73A/I137RΩkan, amyE::mifM-yidC2'-lacZΩcat</i>                | This study |
| SCB3634 | <i>spolIIIJ-R73A/L138RΩkan, amyE::mifM-yidC2'-lacZΩcat</i>                | This study |
| SCB3636 | <i>spolIIIJ-R73A/I139RΩkan, amyE::mifM-yidC2'-lacZΩcat</i>                | This study |
| SCB3639 | <i>spolIIIJ-R73A/M141RΩkan, amyE::mifM-yidC2'-lacZΩcat</i>                | This study |
| SCB3641 | <i>spolIIIJ-R73A/P142RΩkan, amyE::mifM-yidC2'-lacZΩcat</i>                | This study |
| SCB3642 | <i>spolIIIJ-R73A/I143RΩkan, amyE::mifM-yidC2'-lacZΩcat</i>                | This study |
| SCB3644 | <i>spolIIIJ-R73A/L144RΩkan, amyE::mifM-yidC2'-lacZΩcat</i>                | This study |
| SCB3646 | <i>spolIIIJ-R73A/A183RΩkan, amyE::mifM-yidC2'-lacZΩcat</i>                | This study |
| SCB3648 | <i>spolIIIJ-R73A/T184RΩkan, amyE::mifM-yidC2'-lacZΩcat</i>                | This study |
| SCB3650 | <i>spolIIIJ-R73A/F185RΩkan, amyE::mifM-yidC2'-lacZΩcat</i>                | This study |
| SCB3652 | <i>spolIIIJ-R73A/V186RΩkan, amyE::mifM-yidC2'-lacZΩcat</i>                | This study |
| SCB3654 | <i>spolIIIJ-R73A/Q187RΩkan, amyE::mifM-yidC2'-lacZΩcat</i>                | This study |
| SCB3656 | <i>spolIIIJ-R73A/Q188RΩkan, amyE::mifM-yidC2'-lacZΩcat</i>                | This study |
| SCB3658 | <i>spolIIIJ-R73A/K189RΩkan, amyE::mifM-yidC2'-lacZΩcat</i>                | This study |
| SCB3660 | <i>spolIIIJ-R73A/L190RΩkan, amyE::mifM-yidC2'-lacZΩcat</i>                | This study |
| SCB3662 | <i>spolIIIJ-R73A/M204RΩkan, amyE::mifM-yidC2'-lacZΩcat</i>                | This study |
| SCB3664 | <i>spolIIIJ-R73A/M205RΩkan, amyE::mifM-yidC2'-lacZΩcat</i>                | This study |
| SCB3666 | <i>spolIIIJ-R73A/L206RΩkan, amyE::mifM-yidC2'-lacZΩcat</i>                | This study |
| SCB3669 | <i>spolIIIJ-R73A/W207RΩkan, amyE::mifM-yidC2'-lacZΩcat</i>                | This study |
| SCB3670 | <i>spolIIIJ-R73A/I208RΩkan, amyE::mifM-yidC2'-lacZΩcat</i>                | This study |
| SCB3673 | <i>spolIIIJ-R73A/M209RΩkan, amyE::mifM-yidC2'-lacZΩcat</i>                | This study |
| SCB3676 | <i>spolIIIJ-R73A/I211RΩkan, amyE::mifM-yidC2'-lacZΩcat</i>                | This study |
| SCB3678 | <i>spolIIIJ-R73A/M212RΩkan, amyE::mifM-yidC2'-lacZΩcat</i>                | This study |

Table S1. Cont.

| Strains | Genotype                                                                                                         | Source     |
|---------|------------------------------------------------------------------------------------------------------------------|------------|
| SCB3680 | <i>spolIJJ-R73A/I213R</i> Ωkan, <i>amyE::mifM-yidC2'-lacZ</i> Ωcat                                               | This study |
| SCB3682 | <i>spolIJJ-R73A/IY227R</i> Ωkan, <i>amyE::mifM-yidC2'-lacZ</i> Ωcat                                              | This study |
| SCB3686 | <i>spolIJJ-R73A/IM191R</i> Ωkan, <i>amyE::mifM-yidC2'-lacZ</i> Ωcat                                              | This study |
| SCB3687 | <i>spolIJJ-R73A/IM192R</i> Ωkan, <i>amyE::mifM-yidC2'-lacZ</i> Ωcat                                              | This study |
| SCB3688 | <i>spolIJJ-R73A/IP210R</i> Ωkan, <i>amyE::mifM-yidC2'-lacZ</i> Ωcat                                              | This study |
| SCB3711 | <i>spolIJJ-L71R/R73A</i> Ωkan, <i>amyE::mifM-yidC2'-lacZ</i> Ωcat                                                | This study |
| SCB3732 | <i>spolIJJ-T69R-R73A</i> Ωkan, Δ <i>yidC2::ermIpCH1805</i> (Pspac <i>spolIJJ-FLAG</i> )                          | This study |
| SCB3733 | <i>spolIJJ-I72R-R73A</i> Ωkan, Δ <i>yidC2::ermIpCH1805</i> (Pspac <i>spolIJJ-FLAG</i> )                          | This study |
| SCB3734 | <i>spolIJJ-R73A-I76R</i> Ωkan, Δ <i>yidC2::ermIpCH1805</i> (Pspac <i>spolIJJ-FLAG</i> )                          | This study |
| SCB3735 | <i>spolIJJ-R73A-I137R</i> Ωkan, Δ <i>yidC2::ermIpCH1805</i> (Pspac <i>spolIJJ-FLAG</i> )                         | This study |
| SCB3736 | <i>spolIJJ-R73A-L144R</i> Ωkan, Δ <i>yidC2::ermIpCH1805</i> (Pspac <i>spolIJJ-FLAG</i> )                         | This study |
| SCB3737 | <i>spolIJJ-R73A-T184R</i> Ωkan, Δ <i>yidC2::ermIpCH1805</i> (Pspac <i>spolIJJ-FLAG</i> )                         | This study |
| SCB3738 | <i>spolIJJ-R73A-I213R</i> Ωkan, Δ <i>yidC2::ermIpCH1805</i> (Pspac <i>spolIJJ-FLAG</i> )                         | This study |
| SCB3739 | <i>spolIJJ-R73A-Y227R</i> Ωkan, Δ <i>yidC2::ermIpCH1805</i> (Pspac <i>spolIJJ-FLAG</i> )                         | This study |
| SCB3740 | <i>spolIJJ-R73A-W228R</i> Ωkan, Δ <i>yidC2::ermIpCH1805</i> (Pspac <i>spolIJJ-FLAG</i> )                         | This study |
| SCB3741 | <i>spolIJJ-R73A-M235R</i> Ωkan, Δ <i>yidC2::ermIpCH1805</i> (Pspac <i>spolIJJ-FLAG</i> )                         | This study |
| SCB3742 | <i>spolIJJ-6A</i> Ωkan, Δ <i>yidC2::ermIpCH1805</i> (Pspac <i>spolIJJ-FLAG</i> )                                 | This study |
| SCB3743 | <i>spolIJJ-6L</i> Ωkan, Δ <i>yidC2::ermIpCH1805</i> (Pspac <i>spolIJJ-FLAG</i> )                                 | This study |
| SCB3745 | <i>spolIJJ-5N1Q</i> Ωkan, Δ <i>yidC2::ermIpCH1805</i> (Pspac <i>spolIJJ-FLAG</i> )                               | This study |
| SCB3746 | <i>sdm3-spolIJJ-Ω</i> kan, Δ <i>yidC2::ermIpCH1805</i> (Pspac <i>spolIJJ-FLAG</i> )                              | This study |
| NAB316  | <i>spolIJJ-6A</i> (Q140A/I184A/Q187A/Q188A/G231A/N232A)Ωkan,<br><i>amyE::mifM-yidC2'-lacZ</i> Ωcat               | This study |
| NAB323  | <i>spolIJJ-C134A-W228C-6A</i> (Q140A/I184A/Q187A/Q188A/G231A/N232A)Ωkan,<br><i>amyE::mifM-yidC2'-lacZ</i> Ωcat   | This study |
| NAB327  | <i>spolIJJ-Q140L</i> Ωkan, <i>amyE::mifM-yidC2'-lacZ</i> Ωcat                                                    | This study |
| NAB328  | <i>spolIJJ-C134A-I213C-6A</i> (Q140A/I184A/Q187A/Q188A/G231A/N232A)Ωkan,<br><i>amyE::mifM-yidC2'-lacZ</i> Ωcat   | This study |
| NAB331  | <i>spolIJJ-6L</i> (Q140L/I184L/Q187L/Q188L/G231L/N232L)Ωkan,<br><i>amyE::mifM-yidC2'-lacZ</i> Ωcat               | This study |
| NAB339  | <i>spolIJJ-Q140N</i> Ωkan, <i>amyE::mifM-yidC2'-lacZ</i> Ωcat                                                    | This study |
| NAB343  | <i>spolIJJ-5N1Q</i> (Q140N/I184N/Q187N/Q188N/G231N/N232Q)Ωkan,<br><i>amyE::mifM-yidC2'-lacZ</i> Ωcat             | This study |
| NAB345  | <i>spolIJJ-C134A-I213C-6L</i> (Q140L/I184L/Q187L/Q188L/G231L/N232L)Ωkan,<br><i>amyE::mifM-yidC2'-lacZ</i> Ωcat   | This study |
| NAB347  | <i>spolIJJ-C134A-W228C-6L</i> (Q140L/I184L/Q187L/Q188L/G231L/N232L)Ωkan,<br><i>amyE::mifM-yidC2'-lacZ</i> Ωcat   | This study |
| NAB349  | <i>spolIJJ-C134A-I213C-5N1Q</i> (Q140N/I184N/Q187N/Q188N/G231N/N232Q)Ωkan,<br><i>amyE::mifM-yidC2'-lacZ</i> Ωcat | This study |
| NAB351  | <i>spolIJJ-C134A-W228C-5N1Q</i> (Q140N/I184N/Q187N/Q188N/G231N/N232Q)Ωkan,<br><i>amyE::mifM-yidC2'-lacZ</i> Ωcat | This study |
| NAB360  | <i>sdm3-spolIJJ</i> Ωkan, <i>amyE::mifM-yidC2'-lacZ</i> Ωcat                                                     | This study |

1. Kumazaki K, et al. (2014) Structural basis of Sec-independent membrane protein insertion by YidC. *Nature* 509(7501):516–520.

**Table S2. Plasmids used in this study**

| Plasmid | Genotype                            | Method or reference       | Primers     | Template |
|---------|-------------------------------------|---------------------------|-------------|----------|
| pCH1777 | <i>spolIIIJ-R73AΩkanΩjag</i>        | Kumazaki et al. (1)       |             |          |
| pCH1805 | <i>Pspac spolIIIJ-FLAG</i>          | Kumazaki et al. (1)       |             |          |
| pCH1822 | <i>spolIIIJ-R73A-G231RΩkanΩjag</i>  | Site-directed mutagenesis | SP175       | pCH1777  |
| pCH1852 | <i>spolIIIJ-R73A-Q140RΩkanΩjag</i>  | Site-directed mutagenesis | SP176       | pCH1777  |
| pCH1853 | <i>spolIIIJ-C134AΩkanΩjag</i>       | Site-directed mutagenesis | SP177       | pCH1763  |
| pCH1878 | <i>spolIIIJ-L71C-C134AΩkanΩjag</i>  | Site-directed mutagenesis | SP178       | pCH1853  |
| pCH1879 | <i>spolIIIJ-R73C-C134AΩkanΩjag</i>  | Site-directed mutagenesis | SP179       | pCH1853  |
| pCH1880 | <i>spolIIIJ-C134A-V186CΩkanΩjag</i> | Site-directed mutagenesis | SP180       | pCH1853  |
| pCH1881 | <i>spolIIIJ-C134A-Q187CΩkanΩjag</i> | Site-directed mutagenesis | SP181       | pCH1853  |
| pCH1882 | <i>spolIIIJ-C134A-W228CΩkanΩjag</i> | Site-directed mutagenesis | SP182       | pCH1853  |
| pCH1909 | <i>spolIIIJ-C134A-E169CΩkanΩjag</i> | Site-directed mutagenesis | SP183       | pCH1853  |
| pCH1910 | <i>spolIIIJ-C134A-V179CΩkanΩjag</i> | Site-directed mutagenesis | SP184       | pCH1853  |
| pCH1911 | <i>spolIIIJ-C134A-A180CΩkanΩjag</i> | Site-directed mutagenesis | SP185       | pCH1853  |
| pCH1912 | <i>spolIIIJ-C134A-G181CΩkanΩjag</i> | Site-directed mutagenesis | SP186       | pCH1853  |
| pCH1913 | <i>spolIIIJ-C134A-V182CΩkanΩjag</i> | Site-directed mutagenesis | SP187       | pCH1853  |
| pCH1914 | <i>spolIIIJ-C134A-A183CΩkanΩjag</i> | Site-directed mutagenesis | SP188       | pCH1853  |
| pCH1915 | <i>spolIIIJ-C134A-F185CΩkanΩjag</i> | Site-directed mutagenesis | SP189       | pCH1853  |
| pCH1916 | <i>spolIIIJ-C134A-Q188CΩkanΩjag</i> | Site-directed mutagenesis | SP190       | pCH1853  |
| pCH1917 | <i>spolIIIJ-C134A-K189CΩkanΩjag</i> | Site-directed mutagenesis | SP191       | pCH1853  |
| pCH1926 | <i>spolIIIJ-R73A-N232RΩkanΩjag</i>  | Site-directed mutagenesis | SP192       | pCH1777  |
| pCH1927 | <i>spolIIIJ-R73A-M235RΩkanΩjag</i>  | Site-directed mutagenesis | SP193       | pCH1777  |
| pCH1928 | <i>spolIIIJ-R73A-I236RΩkanΩjag</i>  | Site-directed mutagenesis | SP194       | pCH1777  |
| pCH1929 | <i>spolIIIJ-C134A-I137CΩkanΩjag</i> | Site-directed mutagenesis | SP195       | pCH1853  |
| pCH1930 | <i>spolIIIJ-C134A-L138CΩkanΩjag</i> | Site-directed mutagenesis | SP196       | pCH1853  |
| pCH1931 | <i>spolIIIJ-C134A-I139CΩkanΩjag</i> | Site-directed mutagenesis | SP197       | pCH1853  |
| pCH1932 | <i>spolIIIJ-C134A-M141CΩkanΩjag</i> | Site-directed mutagenesis | SP198       | pCH1853  |
| pCH1933 | <i>spolIIIJ-C134A-I143CΩkanΩjag</i> | Site-directed mutagenesis | SP199       | pCH1853  |
| pCH1934 | <i>spolIIIJ-C134A-L145CΩkanΩjag</i> | Site-directed mutagenesis | SP200       | pCH1853  |
| pCH1935 | <i>spolIIIJ-C134A-G146CΩkanΩjag</i> | Site-directed mutagenesis | SP201       | pCH1853  |
| pCH1936 | <i>spolIIIJ-C134A-L224CΩkanΩjag</i> | Site-directed mutagenesis | SP202       | pCH1853  |
| pCH1937 | <i>spolIIIJ-C134A-S225CΩkanΩjag</i> | Site-directed mutagenesis | SP203       | pCH1853  |
| pCH1938 | <i>spolIIIJ-C134A-L226CΩkanΩjag</i> | Site-directed mutagenesis | SP204       | pCH1853  |
| pCH1939 | <i>spolIIIJ-C134A-L233CΩkanΩjag</i> | Site-directed mutagenesis | SP205       | pCH1853  |
| pCH1941 | <i>spolIIIJ-R73A-V229RΩkanΩjag</i>  | Site-directed mutagenesis | SP206       | pCH1777  |
| pCH1942 | <i>spolIIIJ-R73A-V230RΩkanΩjag</i>  | Site-directed mutagenesis | SP207       | pCH1777  |
| pCH1943 | <i>spolIIIJ-R73A-F234RΩkanΩjag</i>  | Site-directed mutagenesis | SP208       | pCH1777  |
| pCH1944 | <i>spolIIIJ-C134A-Y227CΩkanΩjag</i> | Site-directed mutagenesis | SP209       | pCH1853  |
| pCH1945 | <i>spolIIIJ-C134A-V229CΩkanΩjag</i> | Site-directed mutagenesis | SP210       | pCH1853  |
| pCH1948 | <i>spolIIIJ-C134A-Q140CΩkanΩjag</i> | Site-directed mutagenesis | SP211       | pCH1853  |
| pCH1949 | <i>spolIIIJ-C134A-P142CΩkanΩjag</i> | Site-directed mutagenesis | SP212       | pCH1853  |
| pCH1950 | <i>spolIIIJ-C134A-F147CΩkanΩjag</i> | Site-directed mutagenesis | SP213       | pCH1853  |
| pCH1951 | <i>spolIIIJ-C134A-V230CΩkanΩjag</i> | Site-directed mutagenesis | SP214       | pCH1853  |
| pCH1952 | <i>spolIIIJ-C134A-G231CΩkanΩjag</i> | Site-directed mutagenesis | SP215       | pCH1853  |
| pCH1953 | <i>spolIIIJ-C134A-I175CΩkanΩjag</i> | Site-directed mutagenesis | SP216       | pCH1853  |
| pCH1954 | <i>spolIIIJ-C134A-L176CΩkanΩjag</i> | Site-directed mutagenesis | SP217       | pCH1853  |
| pCH1955 | <i>spolIIIJ-C134A-P177CΩkanΩjag</i> | Site-directed mutagenesis | SP218       | pCH1853  |
| pCH1956 | <i>spolIIIJ-C134A-I178CΩkanΩjag</i> | Site-directed mutagenesis | SP219       | pCH1853  |
| pCH1973 | <i>spolIIIJ-C134A-L206CΩkanΩjag</i> | PrimeSTAR mutagenesis     | SP220/SP221 | pCH1853  |
| pCH1974 | <i>spolIIIJ-C134A-I208CΩkanΩjag</i> | PrimeSTAR mutagenesis     | SP222/SP223 | pCH1853  |

1. Kumazaki K, et al. (2014) Structural basis of Sec-independent membrane protein insertion by YidC. *Nature* 509(7501):516–520.



**Table S3. Strain construction procedures**

| Strains | Methods                   | Plasmid | Primers   | Template DNA |
|---------|---------------------------|---------|-----------|--------------|
| SCB3142 | Transformation            | pCH1853 |           |              |
| SCB3210 | Transformation            | pCH1878 |           |              |
| SCB3211 | Transformation            | pCH1879 |           |              |
| SCB3212 | Transformation            | pCH1880 |           |              |
| SCB3213 | Transformation            | pCH1881 |           |              |
| SCB3214 | Transformation            | pCH1882 |           |              |
| SCB3303 | Transformation            | pCH1909 |           |              |
| SCB3304 | Transformation            | pCH1910 |           |              |
| SCB3305 | Transformation            | pCH1911 |           |              |
| SCB3306 | Transformation            | pCH1912 |           |              |
| SCB3307 | Transformation            | pCH1913 |           |              |
| SCB3308 | Transformation            | pCH1914 |           |              |
| SCB3309 | Transformation            | pCH1915 |           |              |
| SCB3310 | Transformation            | pCH1916 |           |              |
| SCB3311 | Transformation            | pCH1917 |           |              |
| SCB3425 | Transformation            | pCH1929 |           |              |
| SCB3426 | Transformation            | pCH1930 |           |              |
| SCB3427 | Transformation            | pCH1931 |           |              |
| SCB3428 | Transformation            | pCH1932 |           |              |
| SCB3429 | Transformation            | pCH1933 |           |              |
| SCB3430 | Transformation            | pCH1934 |           |              |
| SCB3431 | Transformation            | pCH1935 |           |              |
| SCB3432 | Transformation            | pCH1936 |           |              |
| SCB3433 | Transformation            | pCH1937 |           |              |
| SCB3434 | Transformation            | pCH1938 |           |              |
| SCB3435 | Transformation            | pCH1939 |           |              |
| SCB3439 | Transformation            | pCH1944 |           |              |
| SCB3440 | Transformation            | pCH1945 |           |              |
| SCB3441 | Transformation            | pCH1948 |           |              |
| SCB3442 | Transformation            | pCH1949 |           |              |
| SCB3443 | Transformation            | pCH1950 |           |              |
| SCB3444 | Transformation            | pCH1951 |           |              |
| SCB3445 | Site-directed mutagenesis |         | SP1       | pCH1853      |
| SCB3516 | PrimeSTAR mutagenesis     |         | SP2/SP3   | pCH1853      |
| SCB3517 | Transformation            | pCH1952 |           |              |
| SCB3518 | Transformation            | pCH1953 |           |              |
| SCB3519 | Transformation            | pCH1954 |           |              |
| SCB3520 | Transformation            | pCH1955 |           |              |
| SCB3521 | Transformation            | pCH1956 |           |              |
| SCB3535 | PrimeSTAR mutagenesis     |         | SP4/SP5   | pCH1853      |
| SCB3536 | PrimeSTAR mutagenesis     |         | SP6/SP7   | pCH1853      |
| SCB3537 | PrimeSTAR mutagenesis     |         | SP8/SP9   | pCH1853      |
| SCB3538 | PrimeSTAR mutagenesis     |         | SP10/SP11 | pCH1853      |
| SCB3539 | PrimeSTAR mutagenesis     |         | SP12/SP13 | pCH1853      |
| SCB3540 | PrimeSTAR mutagenesis     |         | SP14/SP15 | pCH1853      |
| SCB3541 | PrimeSTAR mutagenesis     |         | SP16/SP17 | pCH1853      |
| SCB3542 | PrimeSTAR mutagenesis     |         | SP18/SP19 | pCH1853      |
| SCB3543 | PrimeSTAR mutagenesis     |         | SP20/SP21 | pCH1853      |
| SCB3544 | PrimeSTAR mutagenesis     |         | SP22/SP23 | pCH1853      |
| SCB3545 | PrimeSTAR mutagenesis     |         | SP24/SP25 | pCH1853      |
| SCB3546 | PrimeSTAR mutagenesis     |         | SP26/SP27 | pCH1853      |
| SCB3547 | PrimeSTAR mutagenesis     |         | SP28/SP29 | pCH1853      |
| SCB3548 | PrimeSTAR mutagenesis     |         | SP30/SP31 | pCH1853      |
| SCB3549 | PrimeSTAR mutagenesis     |         | SP32/SP33 | pCH1853      |
| SCB3550 | PrimeSTAR mutagenesis     |         | SP34/SP35 | pCH1853      |
| SCB3551 | PrimeSTAR mutagenesis     |         | SP36/SP37 | pCH1853      |
| SCB3552 | PrimeSTAR mutagenesis     |         | SP38/SP39 | pCH1853      |
| SCB3553 | PrimeSTAR mutagenesis     |         | SP40/SP41 | pCH1853      |
| SCB3554 | PrimeSTAR mutagenesis     |         | SP42/SP43 | pCH1853      |
| SCB3555 | PrimeSTAR mutagenesis     |         | SP44/SP45 | pCH1853      |
| SCB3556 | PrimeSTAR mutagenesis     |         | SP46/SP47 | pCH1853      |
| SCB3557 | PrimeSTAR mutagenesis     |         | SP48/SP49 | pCH1853      |
| SCB3558 | PrimeSTAR mutagenesis     |         | SP50/SP51 | pCH1853      |

Table S3. Cont.

| Strains | Methods                   | Plasmid | Primers     | Template DNA |
|---------|---------------------------|---------|-------------|--------------|
| SCB3559 | PrimeSTAR mutagenesis     |         | SP52/SP53   | pCH1853      |
| SCB3560 | PrimeSTAR mutagenesis     |         | SP54/SP55   | pCH1853      |
| SCB3562 | PrimeSTAR mutagenesis     |         | SP56/SP57   | pCH1853      |
| SCB3564 | PrimeSTAR mutagenesis     |         | SP58/SP59   | pCH1853      |
| SCB3565 | PrimeSTAR mutagenesis     |         | SP60/SP61   | pCH1853      |
| SCB3566 | PrimeSTAR mutagenesis     |         | SP62/SP63   | pCH1853      |
| SCB3567 | PrimeSTAR mutagenesis     |         | SP64/SP65   | pCH1853      |
| SCB3568 | PrimeSTAR mutagenesis     |         | SP66/SP67   | pCH1853      |
| SCB3570 | PrimeSTAR mutagenesis     |         | SP68/SP69   | pCH1853      |
| SCB3571 | PrimeSTAR mutagenesis     |         | SP70/SP71   | pCH1853      |
| SCB3587 | PrimeSTAR mutagenesis     |         | SP72/SP73   | pCH1853      |
| SCB3588 | Transformation            | pCH1973 |             |              |
| SCB3589 | Transformation            | pCH1974 |             |              |
| SCB2989 | Transformation            | pCH1777 |             |              |
| SCB3056 | Transformation            | pCH1777 |             |              |
| SCB3141 | Transformation            | pCH1852 |             |              |
| SCB3177 | Transformation            | pCH1822 |             |              |
| SCB3178 | Transformation            | pCH1852 |             |              |
| SCB3412 | Site-directed mutagenesis |         | SP74        | pCH1777      |
| SCB3413 | Site-directed mutagenesis |         | SP75        | pCH1777      |
| SCB3414 | Transformation            | pCH1926 |             |              |
| SCB3415 | Transformation            | pCH1927 |             |              |
| SCB3416 | Transformation            | pCH1928 |             |              |
| SCB3417 | Transformation            | pCH1941 |             |              |
| SCB3418 | Transformation            | pCH1942 |             |              |
| SCB3419 | Transformation            | pCH1943 |             |              |
| SCB3612 | PrimeSTAR mutagenesis     |         | SP76/SP77   | pCH1777      |
| SCB3614 | PrimeSTAR mutagenesis     |         | SP78/SP79   | pCH1777      |
| SCB3616 | PrimeSTAR mutagenesis     |         | SP80/SP81   | pCH1777      |
| SCB3619 | PrimeSTAR mutagenesis     |         | SP82/SP83   | pCH1777      |
| SCB3620 | PrimeSTAR mutagenesis     |         | SP84/SP85   | pCH1777      |
| SCB3622 | PrimeSTAR mutagenesis     |         | SP86/SP87   | pCH1777      |
| SCB3624 | PrimeSTAR mutagenesis     |         | SP88/SP89   | pCH1777      |
| SCB3626 | PrimeSTAR mutagenesis     |         | SP90/SP91   | pCH1777      |
| SCB3628 | PrimeSTAR mutagenesis     |         | SP92/SP93   | pCH1777      |
| SCB3630 | PrimeSTAR mutagenesis     |         | SP94/SP95   | pCH1777      |
| SCB3632 | PrimeSTAR mutagenesis     |         | SP96/SP97   | pCH1777      |
| SCB3634 | PrimeSTAR mutagenesis     |         | SP98/SP99   | pCH1777      |
| SCB3636 | PrimeSTAR mutagenesis     |         | SP100/SP101 | pCH1777      |
| SCB3639 | PrimeSTAR mutagenesis     |         | SP102/SP103 | pCH1777      |
| SCB3641 | PrimeSTAR mutagenesis     |         | SP104/SP105 | pCH1777      |
| SCB3642 | PrimeSTAR mutagenesis     |         | SP106/SP107 | pCH1777      |
| SCB3644 | PrimeSTAR mutagenesis     |         | SP108/SP109 | pCH1777      |
| SCB3646 | PrimeSTAR mutagenesis     |         | SP110/SP111 | pCH1777      |
| SCB3648 | PrimeSTAR mutagenesis     |         | SP112/SP113 | pCH1777      |
| SCB3650 | PrimeSTAR mutagenesis     |         | SP114/SP115 | pCH1777      |
| SCB3652 | PrimeSTAR mutagenesis     |         | SP116/SP117 | pCH1777      |
| SCB3654 | PrimeSTAR mutagenesis     |         | SP118/SP119 | pCH1777      |
| SCB3656 | PrimeSTAR mutagenesis     |         | SP120/SP121 | pCH1777      |
| SCB3658 | PrimeSTAR mutagenesis     |         | SP122/SP123 | pCH1777      |
| SCB3660 | PrimeSTAR mutagenesis     |         | SP124/SP125 | pCH1777      |
| SCB3662 | PrimeSTAR mutagenesis     |         | SP126/SP127 | pCH1777      |
| SCB3664 | PrimeSTAR mutagenesis     |         | SP128/SP129 | pCH1777      |
| SCB3666 | PrimeSTAR mutagenesis     |         | SP130/SP131 | pCH1777      |
| SCB3669 | PrimeSTAR mutagenesis     |         | SP132/SP133 | pCH1777      |
| SCB3670 | PrimeSTAR mutagenesis     |         | SP134/SP135 | pCH1777      |
| SCB3673 | PrimeSTAR mutagenesis     |         | SP136/SP137 | pCH1777      |
| SCB3676 | PrimeSTAR mutagenesis     |         | SP138/SP139 | pCH1777      |
| SCB3678 | PrimeSTAR mutagenesis     |         | SP140/SP141 | pCH1777      |
| SCB3680 | PrimeSTAR mutagenesis     |         | SP142/SP143 | pCH1777      |
| SCB3682 | PrimeSTAR mutagenesis     |         | SP144/SP145 | pCH1777      |
| SCB3686 | PrimeSTAR mutagenesis     |         | SP146/SP147 | pCH1777      |
| SCB3687 | PrimeSTAR mutagenesis     |         | SP148/SP149 | pCH1777      |

Table S3. Cont.

| Strains | Methods               | Plasmid | Primers     | Template DNA |
|---------|-----------------------|---------|-------------|--------------|
| SCB3688 | PrimeSTAR mutagenesis |         | SP150/SP151 | pCH1777      |
| SCB3711 | PrimeSTAR mutagenesis |         | SP152/SP153 | pCH1777      |
| SCB3732 | Transformation        | SCB3614 |             |              |
| SCB3733 | Transformation        | SCB3619 |             |              |
| SCB3734 | Transformation        | SCB3624 |             |              |
| SCB3735 | Transformation        | SCB3632 |             |              |
| SCB3736 | Transformation        | SCB3644 |             |              |
| SCB3737 | Transformation        | SCB3648 |             |              |
| SCB3738 | Transformation        | SCB3680 |             |              |
| SCB3739 | Transformation        | SCB3682 |             |              |
| SCB3740 | Transformation        | SCB3412 |             |              |
| SCB3741 | Transformation        | SCB3415 |             |              |
| SCB3742 | Transformation        | NAB316  |             |              |
| SCB3743 | Transformation        | NAB331  |             |              |
| SCB3745 | Transformation        | NAB343  |             |              |
| SCB3746 | Transformation        | NAB360  |             |              |
| NAB316  | PCR/Gibson assembly   |         | SP154/SP155 | SCB2994      |
|         |                       |         | SP156/SP157 | SCB2994      |
|         |                       |         | SP158/SP159 | SCB2994      |
| NAB323  | PCR/Gibson assembly   |         | SP154/SP160 | NAB316       |
|         |                       |         | SP161/SP162 | NAB316       |
|         |                       |         | SP163/SP159 | NAB316       |
| NAB327  | PCR/Gibson assembly   |         | SP154/SP164 | SCB3065      |
|         |                       |         | SP165/SP159 | SCB3065      |
| NAB328  | PCR/Gibson assembly   |         | SP154/SP160 | NAB316       |
|         |                       |         | SP161/SP172 | NAB316       |
|         |                       |         | SP166/SP159 | NAB316       |
| NAB331  | PCR/Gibson assembly   |         | SP154/SP155 | NAB327       |
|         |                       |         | SP167/SP157 | NAB327       |
|         |                       |         | SP168/SP159 | NAB327       |
| NAB339  | PCR/Gibson assembly   |         | SP154/SP164 | SCB3065      |
|         |                       |         | SP169/SP159 | SCB3065      |
| NAB343  | PCR/Gibson assembly   |         | SP154/SP155 | NAB339       |
|         |                       |         | SP170/SP157 | NAB339       |
|         |                       |         | SP171/SP159 | NAB339       |
| NAB345  | PCR/Gibson assembly   |         | SP154/SP160 | NAB331       |
|         |                       |         | SP161/SP172 | NAB331       |
|         |                       |         | SP166/SP159 | NAB331       |
| NAB347  | PCR/Gibson assembly   |         | SP154/SP160 | NAB331       |
|         |                       |         | SP161/SP162 | NAB331       |
|         |                       |         | SP163/SP159 | NAB331       |
| NAB349  | PCR/Gibson assembly   |         | SP154/SP160 | NAB343       |
|         |                       |         | SP161/SP172 | NAB343       |
|         |                       |         | SP166/SP159 | NAB343       |
| NAB351  | PCR/Gibson assembly   |         | SP154/SP160 | NAB343       |
|         |                       |         | SP161/SP162 | NAB343       |
|         |                       |         | SP163/SP159 | NAB343       |
| NAB360  | PCR/Gibson assembly   |         | SP154/SP173 | SCB3117      |
|         |                       |         | SP174/SP159 | SCB3065      |

**Table S4. Oligo nucleotides sequence**

| Primer | DNA sequence                                    |
|--------|-------------------------------------------------|
| SP1    | 5'-TTGATCCAGATGCCGATTTGTATTGGATTCTATCATGCG-3'   |
| SP2    | 5'-GTCGCTTGT TTTGTTCAGCAAAAAGTATG-3'            |
| SP3    | 5'-AACAAAACAAGCGACACCGGCAACGATAGG-3'            |
| SP4    | 5'-GTAGTTGGTTGTTTGT TTTATGATTGCGCAAAGT-3'       |
| SP5    | 5'-CATAAACAAAACAACCACTACCCAATAAAGAGA-3'         |
| SP6    | 5'-GATAACTACGGGCTTTCATGTATTCTAGTTACCATTTTA-3'   |
| SP7    | 5'-ACATGAAAGCCCGTAGTTATCTCCCGTCAATTT-3'         |
| SP8    | 5'-AACTACGGGCTTTC AATTTGTCTAGTTACCATTTTAATT-3'  |
| SP9    | 5'-ACAAATTGAAAGCCCGTAGTTATCTCCCGTCAA-3'         |
| SP10   | 5'-TACGGGCTTTC AATTTATTTGTGTACCATT TTAATTCGT-3' |
| SP11   | 5'-ACAAATAATTGAAAGCCCGTAGTTATCTCCCGT-3'         |
| SP12   | 5'-GGGCTTTC AATTTATCTATGTACCATT TTAATTCGTTTA-3' |
| SP13   | 5'-ACATAGAATAATTGAAAGCCCGTAGTTATCTCC-3'         |
| SP14   | 5'-TCAATTTATCTAGTTACCTGTTTAATTCGTTTATTAATT-3'   |
| SP15   | 5'-ACAGGTAAGTAGAATAATTGAAAGCCCGTAGTT-3'         |
| SP16   | 5'-GTTACCATTTTAATTCGTTGTTTAATTTTACCCTGATG-3'    |
| SP17   | 5'-ACAACGAATTA AAAATGGTAACTAGAATAATTGA-3'       |
| SP18   | 5'-ATTTTAATTCGTTTATTTATGTTTACCCTGATGATTAAG-3'   |
| SP19   | 5'-ACATAATAACGAATTA AAAATGGTAACTAGAAT-3'        |
| SP20   | 5'-TTAATTCGTTTATTAATTTGTCCCGTGTATTAAGCAG-3'     |
| SP21   | 5'-ACAAATTAATAACGAATTA AAAATGGTAACTAG-3'        |
| SP22   | 5'-CCGATTTTAATTTGGATTTCTGTCATGCGATCATGAGAACC-3' |
| SP23   | 5'-ACAGAATCCAATTA AAAATCGGCATCTGGATCAA-3'       |
| SP24   | 5'-TTAATTTGGATTCTATCATTTGTATCATGAGAACCAGGCG-3'  |
| SP25   | 5'-ACAATGATAGAAATCCAATTA AAAATCGGCATCTG-3'      |
| SP26   | 5'-ATTGGATTCTATCATGCGTGTATGAGAACCAGGCGATT-3'    |
| SP27   | 5'-ACACGCATGATAGAATCCAATTA AAAATCGGCAT-3'       |
| SP28   | 5'-GGATTCTATCATGCGATCTGTAGAACCAGGCGATTCA-3'     |
| SP29   | 5'-ACAGATCGCATGATAGAATCCAATTA AAAATCGG-3'       |
| SP30   | 5'-CAAATGGCGATGATGCTTTGTATTATGCCAATTATGATT-3'   |
| SP31   | 5'-ACAAAGCATCATCGCCATTTGCGGATTTTGCTG-3'         |
| SP32   | 5'-GCGATGATGCTTTGGATTTGTCCAATTATGATTATCGTA-3'   |
| SP33   | 5'-ACAAATCCAAGCATCATCGCCATTTGCGGATT-3'          |
| SP34   | 5'-ATGATGCTTTGGATTATGTGTATTATGATTATCGTATTT-3'   |
| SP35   | 5'-ACACATAATCCAAGCATCATCGCCATTTGCGG-3'          |
| SP36   | 5'-ATGCTTTGGATTATGCCATGTATGATTATCGTATTTGCG-3'   |
| SP37   | 5'-ACATGGCATAATCCAAGCATCATCGCCATTTG-3'          |
| SP38   | 5'-CTTTGGATTATGCCAATTTGTATTATCGTATTTGCGATC-3'   |
| SP39   | 5'-ACAAATGGCATAATCCAAGCATCATCGCCAT-3'           |
| SP40   | 5'-TGGATTATGCCAATTATGTGTATCGTATTTGCGATCAAC-3'   |
| SP41   | 5'-ACACATAATTTGGCATAATCCAAGCATCATCGC-3'         |
| SP42   | 5'-ATGCCAATTATGATTATCTGTTTGGCGATCAACTTCCCG-3'   |
| SP43   | 5'-ACAGATAATCATAATTTGGCATAATCCAAGCAT-3'         |
| SP44   | 5'-CCAATTATGATTATCGTATGTGCGATCAACTTCCCGGCG-3'   |
| SP45   | 5'-ACATACGATAATCATAATTTGGCATAATCCAAG-3'         |
| SP46   | 5'-ATTATGATTATCGTATTTGTATCAACTTCCCGGCGGCT-3'    |
| SP47   | 5'-ACAAAATACGATAATCATAATTTGGCATAATCCA-3'        |
| SP48   | 5'-ATGATTATCGTATTTGCGGTGTAACCTTCCCGGCGGCTCTT-3' |
| SP49   | 5'-ACACGCAAATACGATAATCATAATTTGGCATAAT-3'        |
| SP50   | 5'-GTAGTTGGTAACTTGT TTTGTATTGCGCAAAGTTCCTC-3'   |
| SP51   | 5'-ACAAAACAAGTTACCAACTACCCAATAAAGAGA-3'         |
| SP52   | 5'-GTTGGTAACTTGT TTTATGTGTGCGCAAAGTTCCTCATT-3'  |
| SP53   | 5'-ACACATAAACAGTTACCAACTACCCAATAAAG-3'          |
| SP54   | 5'-GGTAACTTGT TTTATGATTGTGCAAAGTTCCTCATTA-3'    |
| SP55   | 5'-ACAAATCATAAACAGTTACCAACTACCCAATA-3'          |
| SP56   | 5'-ACCATTTAATTCGTTTATGTATTTTACCCTGATGATT-3'     |
| SP57   | 5'-ACATAAACGAATTA AAAATGGTAACTAGAATAAT-3'       |
| SP58   | 5'-CAAAATCCGCAAATGGCGTGTATGCTTTGGATTATGCCA-3'   |
| SP59   | 5'-ACACGCCATTTGCGGATTTGCTGCGCATTGCC-3'          |
| SP60   | 5'-AATCCGCAAATGGCGATGTGCTTTGGATTATGCCAAT-3'     |
| SP61   | 5'-ACACATCGCCATTTGCGGATTTGCTGCGCATT-3'          |
| SP62   | 5'-ATTATGCCAATTATGATTGTGTATTTGCGATCAACTTC-3'    |
| SP63   | 5'-ACAAATCATAATTTGGCATAATCCAAGCATCAT-3'         |



Table S4. Cont.

| Primer | DNA sequence                                    |
|--------|-------------------------------------------------|
| SP64   | 5'-CTTCAATTATCTAGTTTGTATTTAATTCGTTATTA-3'       |
| SP65   | 5'-ACAACTAGATAAATTGAAAGCCCGTAGTTATC-3'          |
| SP66   | 5'-ATTCTAGTTACCATTTTATGTCGTTTATTAATTTTACCG-3'   |
| SP67   | 5'-ACATAAAATGGTAAGTACTAGAATAATTGAAAGCCC-3'      |
| SP68   | 5'-ATTTAATTGGATTCTATTGTGCGATCATGAGAACCAG-3'     |
| SP69   | 5'-ACAATAGAATCCAATTAATAATCGGCATCTGGAT-3'        |
| SP70   | 5'-TACGGGCTTCAATTATTTGTGTACCATTTTAATTCGT-3'     |
| SP71   | 5'-ACAAATAATTGAAAGCCCGTAGTTATCTCCCGT-3'         |
| SP72   | 5'-TGGGTAGTTGGTAAGTGTGTATGATTGCGCAAACCTTC-3'    |
| SP73   | 5'-ACACAAGTTACCAACTACCCAATAAAGAGAAAAG-3'        |
| SP74   | 5'-GCGGCTCTTTCTCTTATCGCGTAGTTGGTAACTTGTTT-3'    |
| SP75   | 5'-TATTGGGTAGTTGGTAACCGCTTATGATTGCGCAAACCTTC-3' |
| SP76   | 5'-ATTCTACGCACCATTTTAATTGCCTTA-3'               |
| SP77   | 5'-AATGGTGCCTAGAATAATTGAAAGCCC-3'               |
| SP78   | 5'-CTAGTTCGCATTTTAATTGCCTTATTA-3'               |
| SP79   | 5'-TAAAATGCGAACTAGAATAATTGAAAG-3'               |
| SP80   | 5'-GTTACCGCTTAATTGCCCTTATTAATT-3'               |
| SP81   | 5'-AATTAAGCGGTAAGTACTAGAATAATTGA-3'             |
| SP82   | 5'-ATTTTACGCGCTTATTAATTTTACCG-3'                |
| SP83   | 5'-TAAGGCGCGTAAAATGGTAACTAGAAT-3'               |
| SP84   | 5'-ATTGCCCGCTTAATTTTACCGCTGATG-3'               |
| SP85   | 5'-AATTAAGCGGCAATTAATAATGGTAAC-3'               |
| SP86   | 5'-GCCTTACGCATTTTACCGCTGATGAT-3'                |
| SP87   | 5'-TAAAATGCGTAAGGCAATTAATAATGGT-3'              |
| SP88   | 5'-TTATTACGCTTACCGCTGATGATTAAG-3'               |
| SP89   | 5'-CGGTAAGCGTAATAAGGCAATTAATAAT-3'              |
| SP90   | 5'-TTAATTGCGCCGCTGATGATTAAGCAG-3'               |
| SP91   | 5'-CAGCGGGCGAATTAATAAGGCAATTA-3'                |
| SP92   | 5'-ATTTTACGCTGATGATTAAGCAGCTG-3'                |
| SP93   | 5'-CATCAGGCGTAAAATTAATAAGGCAAT-3'               |
| SP94   | 5'-TGTTTCCGCATTTTGTATCCAGATGCCG-3'              |
| SP95   | 5'-CAAAATGCGGAAACATCCCGCAATGG-3'                |
| SP96   | 5'-TTCCCGCGCTTGTATCCAGATGCCGAT-3'               |
| SP97   | 5'-GATCAAGCGCGGAAACATCCCGCAA-3'                 |
| SP98   | 5'-CCGATTGCGATCCAGATGCCGATTTTA-3'               |
| SP99   | 5'-CTGGATGCGAATCGGGAACATCCCGC-3'                |
| SP100  | 5'-ATTTTGGCCAGATGCCGATTTTAATT-3'                |
| SP101  | 5'-CATCTGGCGCAAAATCGGGAACATCC-3'                |
| SP102  | 5'-ATCCAGCGCCGATTTTAATTGGATTC-3'                |
| SP103  | 5'-AATCGGGCGCTGGATCAAAATCGGGAA-3'               |
| SP104  | 5'-CAGATGCGCATTTTAATTGGATTCAT-3'                |
| SP105  | 5'-TAAAATGCGCATCTGGATCAAAATCGG-3'               |
| SP106  | 5'-ATGCCGCGCTTAATTGGATTCATCAT-3'                |
| SP107  | 5'-AATTAAGCGCGCATCTGGATCAAAAT-3'                |
| SP108  | 5'-CCGATTGCGATGGATTCATCATGCG-3'                 |
| SP109  | 5'-TCCAATGCGAATCGGCATCTGGATCAA-3'               |
| SP110  | 5'-GGTGTCGCACATTTGTTTCCGCAAAA-3'                |
| SP111  | 5'-AAATGTGCGGACACCGGCAACGATAGG-3'               |
| SP112  | 5'-GTCGCTCGCTTTGTTTCCGCAAAAATG-3'               |
| SP113  | 5'-AACAAAGCGAGCGACACCGGCAACGAT-3'               |
| SP114  | 5'-GCTACACGCTTCCAGCAAAAATGATG-3'                |
| SP115  | 5'-CTGAACGCGTAGCGACACCGGCAAC-3'                 |
| SP116  | 5'-ACATTTCCGCGCAAAAATGATGATG-3'                 |
| SP117  | 5'-TTGCTGGCGAAATGTAGCGACACCGGC-3'               |
| SP118  | 5'-TTTGTTCGCCAAAATGATGATGGCT-3'                 |
| SP119  | 5'-TTTTTGGCGAACAATGTAGCGACACC-3'                |
| SP120  | 5'-GTTTCCGCGCAAAATGATGATGGCTGGC-3'              |
| SP121  | 5'-CAGTTTGCCTGAACAAATGTAGCGAC-3'                |
| SP122  | 5'-CAGCAACGCCTGATGATGGCTGGCAAT-3'               |
| SP123  | 5'-CATCAGCGTTGCTGAACAAATGTAGC-3'                |
| SP124  | 5'-CAAAAACGCATGATGGCTGGCAATGCG-3'               |
| SP125  | 5'-CATCATGCGTTTTTGTGTAACAATGT-3'                |

Table S4. Cont.

| Primer | DNA sequence                                            |
|--------|---------------------------------------------------------|
| SP126  | 5'-ATGGCGGCATGCTTGGATTATGCCA-3'                         |
| SP127  | 5'-AAGCATGCGGCCATTTGCGGATTTTG-3'                        |
| SP128  | 5'-GCGATGCGCCTTTGGATTATGCCAATT-3'                       |
| SP129  | 5'-CCAAAGCGCATCGCCATTTGCGGATT-3'                        |
| SP130  | 5'-ATGATGCGCTGGATTATGCCAATTATG-3'                       |
| SP131  | 5'-AATCCAGCGCATCATCGCCATTTGCGG-3'                       |
| SP132  | 5'-ATGCTTCGCATTATGCCAATTATGATT-3'                       |
| SP133  | 5'-CATAATGCGAAGCATCATCGCCATTTG-3'                       |
| SP134  | 5'-CTTTGGCGCATGCCAATTATGATTATC-3'                       |
| SP135  | 5'-TGGCATGCGCCAAAGCATCATCGCCAT-3'                       |
| SP136  | 5'-TGGATTGCGCCCAATTATGATTATCGTA-3'                      |
| SP137  | 5'-AATTGGGCGAATCCAAAGCATCATCGC-3'                       |
| SP138  | 5'-ATGCCACGCATGATTATCGTATTTGCG-3'                       |
| SP139  | 5'-AATCATGCGTGGCATAATCCAAAGCAT-3'                       |
| SP140  | 5'-CCAATTCGCATTATCGTATTTGCGATC-3'                       |
| SP141  | 5'-GATAATGCGAATTGGCATAATCCAAAG-3'                       |
| SP142  | 5'-ATTATGCGCATCGTATTTGCGATCAAC-3'                       |
| SP143  | 5'-TACGATGCGCATAATTGGCATAATCCA-3'                       |
| SP144  | 5'-TCTCTTCGCTGGGTAGTTGGTAACTTG-3'                       |
| SP145  | 5'-TACCCAGCGAAGAGAAAGAGCCGCCGG-3'                       |
| SP146  | 5'-AAACTGCGCATGGCTGGCAATGCGCAG-3'                       |
| SP147  | 5'-AGCCATGCGCAGTTTTGCTGAACAAA-3'                        |
| SP148  | 5'-CTGATGCGCGCTGGCAATGCGCAGCAA-3'                       |
| SP149  | 5'-GCCAGCGCGCATCAGTTTTTGCTGAAC-3'                       |
| SP150  | 5'-ATTATGCGCATTATGATTATCGTATTT-3'                       |
| SP151  | 5'-CATAATGCGCATAATCCAAAGCATCAT-3'                       |
| SP152  | 5'-ACCATTCGCATTGCCTTATTAATTTTA-3'                       |
| SP153  | 5'-GGCAATGCGAATGGTAACTAGAATAAT-3'                       |
| SP154  | 5'-GGTTGACTTCATCCAAGTCTC-3'                             |
| SP155  | 5'-AGCGACACCGCAACGATAGGAAGAATATAGTA-3'                  |
| SP156  | 5'-ATCGTTGCCGGTGTGCTGCGTTTTGTTGCGGCGAAACTGATGATGGCT-3'  |
| SP157  | 5'-AACTACCCAATAAAGAGAAGAGCCGCCGGAA-3'                   |
| SP158  | 5'-TCTCTTTATTGGGTAGTTGCGGCGTTGTTTATGATTGCG-3'           |
| SP159  | 5'-CATTTCTCTACATCATCATAC-3'                             |
| SP160  | 5'-TCCCGCAATGGATTGACACC-3'                              |
| SP161  | 5'-GGTGTCAATCCATTGGCGGGAGCATTCCCGATTTTGATC-3'           |
| SP162  | 5'-ATAAAGAGAAAGAGCCGCCGG-3'                             |
| SP163  | 5'-CCGGCGGCTCTTCTCTTTATTGCGTAGTTGGTAAC-3'               |
| SP164  | 5'-GATCAAATCGGGAAACATCC-3'                              |
| SP165  | 5'-GGATGTTTCCCGATTTTGATCCTTATGCCGATTTTAATT-3'           |
| SP166  | 5'-CTTTGGATTATGCCAATTATGTGCATCGTATTTGCGATC-3'           |
| SP167  | 5'-CCTATCGTTGCCGGTGTGCTCTTTTTGTTCTCTTAAACTGATGATGGCT-3' |
| SP168  | 5'-CTTCTCTTTATTGGGTAGTTCTTCTTTTGTATGATTGCG-3'           |
| SP169  | 5'-GGATGTTTCCCGATTTTGATCAATATGCCGATTTTAATT-3'           |
| SP170  | 5'-ATCGTTGCCGGTGTGCTAATTTGTAAATAATAACTGATGATGGCT-3'     |
| SP171  | 5'-CTTCTCTTTATTGGGTAGTTAATCAGTTGTTTATGATTGCG-3'         |
| SP172  | 5'-CATAATGGCATAATCCAAAG-3'                              |
| SP173  | 5'-AATTAATAACGAATTAATAAT-3'                             |
| SP174  | 5'-ATTTAATTCGTTTTATTAATT-3'                             |
| SP175  | 5'-TCTCTTTATTGGGTAGTTGCAACTGTTTTATGATTGCG-3'            |
| SP176  | 5'-TGTTTCCCGATTTTGATCCGCATGCCGATTTTAATTGGA-3'           |
| SP177  | 5'-GTCAATCCATTGGCGGGAGCCTTCCCGATTTTGATCCAG-3'           |
| SP178  | 5'-ATTATTCAGTTACCATTTGTATTGTTTTATTAATTTTA-3'            |
| SP179  | 5'-CTAGTTACCATTTAATTTGTTTTATTAATTTTACCGCTG-3'           |
| SP180  | 5'-GCCGGTGTGCTACATTTTGTGTCAGCAAAAAGTATGATG-3'           |
| SP181  | 5'-GGTGTGCTACATTTGTTTTGTCAAAAAGTATGATGGCT-3'            |
| SP182  | 5'-GCGGCTCTTCTCTTTATTGTGTAGTTGGTAACTGTTT-3'             |
| SP183  | 5'-TTATGGTTGACTTAGGATGTAAGAATCCTTACTATAT-3'             |
| SP184  | 5'-TACTATATCTTCCATCTGTGCCGGTGTGCTACATTT-3'              |
| SP185  | 5'-TATATTCCTTCTATCGTTTGTGGTGTGCTACATTTGTT-3'            |
| SP186  | 5'-ATTCTTCTATCGTTGCCGTGTCGCTACATTTGTTTTCAG-3'           |
| SP187  | 5'-CTTCTATCGTTGCCGGTGTGCTACATTTGTTTTCAGAA-3'            |

Table S4. Cont.

| Primer | DNA sequence                                    |
|--------|-------------------------------------------------|
| SP188  | 5'-CCTATCGTTGCCGGTGTCTGTACATTTGTTTCAGCAAAA-3'   |
| SP189  | 5'-GTTGCCGGTGTGCTTACATGTGTTTCAGCAAAAATGATG-3'   |
| SP190  | 5'-GTCGCTACATTTGTTTCAGTGTAAACTGATGATGGCTGGC-3'  |
| SP191  | 5'-GCTACATTTGTTTCAGCAATGCTGTGATGATGGCTGGCAAT-3' |
| SP192  | 5'-CTTTATTGGGTAGTTGGTCGCTTGTTTATGATTGCGCAA-3'   |
| SP193  | 5'-GTAGTTGGTAACTTGTTTCGCATTGCGCAAACCTTCCTC-3'   |
| SP194  | 5'-GTTGGTAACTTGTTTATGCGCGCGCAAACCTTCCTCATT-3'   |
| SP195  | 5'-TTGGCGGGAGCCTTCCCGTGTGATCCAGATGCCGATT-3'     |
| SP196  | 5'-GCCGGAGCCTTCCCGATTGATCCAGATGCCGATTTTA-3'     |
| SP197  | 5'-GGAGCCTTCCCGATTGTTGTGTCAGATGCCGATTTTAATT-3'  |
| SP198  | 5'-TTCCCGATTTTGTATCCAGTGTCCGATTTTAATTGGATT-3'   |
| SP199  | 5'-ATTTTGTATCCAGATGCCGTGTTTAATTGGATTCTATCAT-3'  |
| SP200  | 5'-ATCCAGATGCCGATTTTATGTGGATTCTATCATGCGATC-3'   |
| SP201  | 5'-CAGATGCCGATTTTAATTGTTTCTATCATGCGATCATG-3'    |
| SP202  | 5'-ATCAACTTCCCGCGGCTTGTTCTCTTTATTGGGTAGTT-3'    |
| SP203  | 5'-AACTTCCCGCGGCTCTTTGCTTTTATTGGGTAGTTGGT-3'    |
| SP204  | 5'-TTCCCGCGGCTCTTTCTTGTATTGGGTAGTTGGTAAC-3'     |
| SP205  | 5'-TATTGGGTAGTTGGTAACTGTTTATGATTGCGCAAAC-3'     |
| SP206  | 5'-GCTCTTCTCTTTATGCGCGGTTGGTAACTGTTTATG-3'      |
| SP207  | 5'-CTTCTCTTTTATTGGGTACGCGTAACTGTTTATGATT-3'     |
| SP208  | 5'-TGGGTAGTTGGTAACTTGCATGATTGCGCAAACCTTC-3'     |
| SP209  | 5'-CCGGCGGCTCTTCTCTTTGTTGGGTAGTTGGTAACTTG-3'    |
| SP210  | 5'-GCTCTTCTCTTTATGTTGGTGTGGTAACTGTTTATG-3'      |
| SP211  | 5'-GCCTTCCCGATTTTGTATGATGCGGATTTTAATTGGA-3'     |
| SP212  | 5'-CCGATTTTGTATCCAGATGTGATTTTAATTGGATTCTAT-3'   |
| SP213  | 5'-ATGCCGATTTTAATTGGATGTTATCATGCGATCATGAGA-3'   |
| SP214  | 5'-CTTCTCTTTTATTGGGTATGTGGTAACTGTTTATGATT-3'    |
| SP215  | 5'-TCTCTTTATTGGGTAGTTTGTAACTGTTTATGATTGCG-3'    |
| SP216  | 5'-GAAAAAGATCCTTACTATTGCTTCCCTATCGTTGCCGGT-3'   |
| SP217  | 5'-AAAGATCCTTACTATATTTGTCCTATCGTTGCCGGTGTG-3'   |
| SP218  | 5'-GATCCTTACTATATCTTTGTATCGTTGCCGGTGTGCGT-3'    |
| SP219  | 5'-CCTTACTATATCTTCTTGTGTTGCCGGTGTGCGTACA-3'     |
| SP220  | 5'-CCGCAATGGCGATGATGTGTTGGATTATGCCAATTATG-3'    |
| SP221  | 5'-ACACATCATGCCATTTGCCGATTTTGTGCGC-3'           |
| SP222  | 5'-ATGGCGATGATGCTTGGTGTATGCCAATTATGATTATC-3'    |
| SP223  | 5'-ACACCAAAGCATCATCGCCATTTGCCGATTTG-3'          |
